# Supplementary material
Source: Springer Nature journal article supplement (https://www.springermedizin.de/resource/supplementary/12985_2010_843_MOESM15_ESM.pdf/9609312)

10A Flight Temperature Until Beginning of Descent

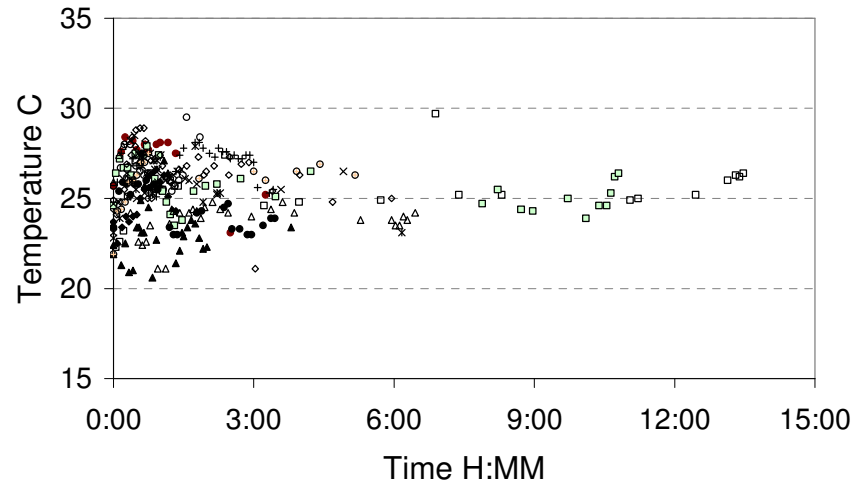

10B Flight Humidity Until Beginning of Descent

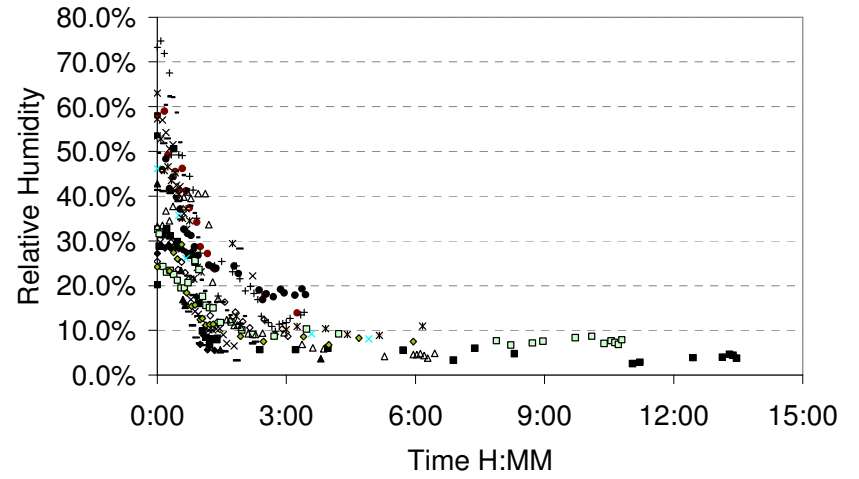

10C Flight Temperature From Beginning of Descent Until Gate

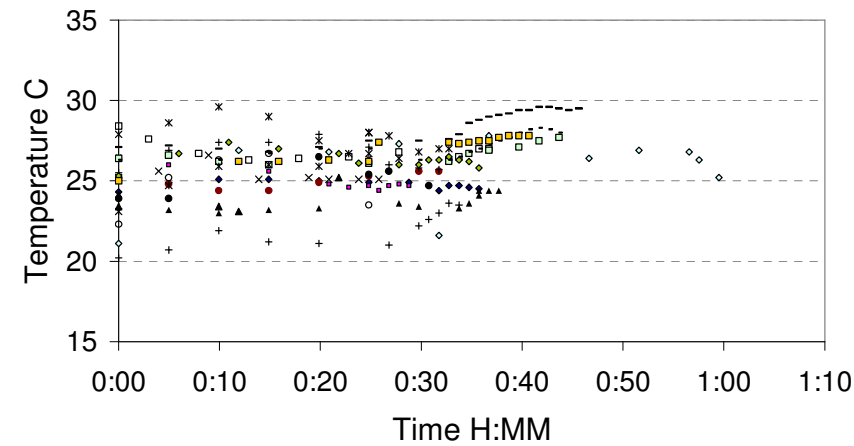

10D Flight Humidity From Beginning of Descent Until Gate

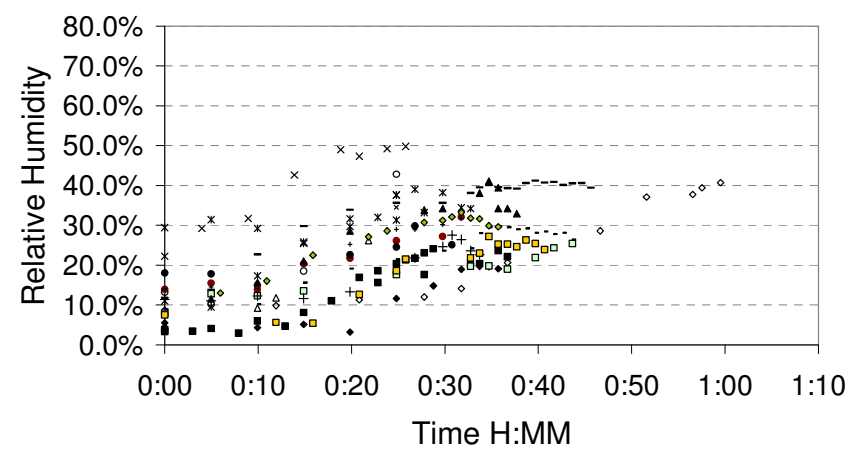

Supplement: MOESM15 [file 9609312]
